# Supplementary material for: Spatial dynamics of TB within a highly urbanised Asian metropolis using point patterns
Source: PubMed Central journal article supplement (PMC5428374; doi:10.1038/s41598-017-00081-3), 2017-02-24
Supplement: 41598_2017_81_MOESM1_ESM.pdf [file 41598_2017_81_MOESM1_ESM.pdf]

# Spatial dynamics of TB within a highly urbanised Asian metropolis using point patterns

Sourav Das\*, Alex R. Cook<sup>†</sup>, Win Wah<sup>†</sup>, Khin Mar Kyi Win\*\*, Cynthia Bin Eng Chee\*\*, Yee Tang Wang\*\*, Hsu Li Yang<sup>†\*\*†</sup>

\*School of Mathematics, University of Bristol.

<sup>†</sup> Saw Swee Hock School of Public Health, National University of Singapore and National University Health System.

\*\* Tuberculosis Control Unit, Singapore TB Elimination Program, Ministry of Health, Singapore.

<sup>†</sup>corresponding author: [hsuliyang@gmail.com](mailto:hsuliyang@gmail.com)

## Supplementary Information

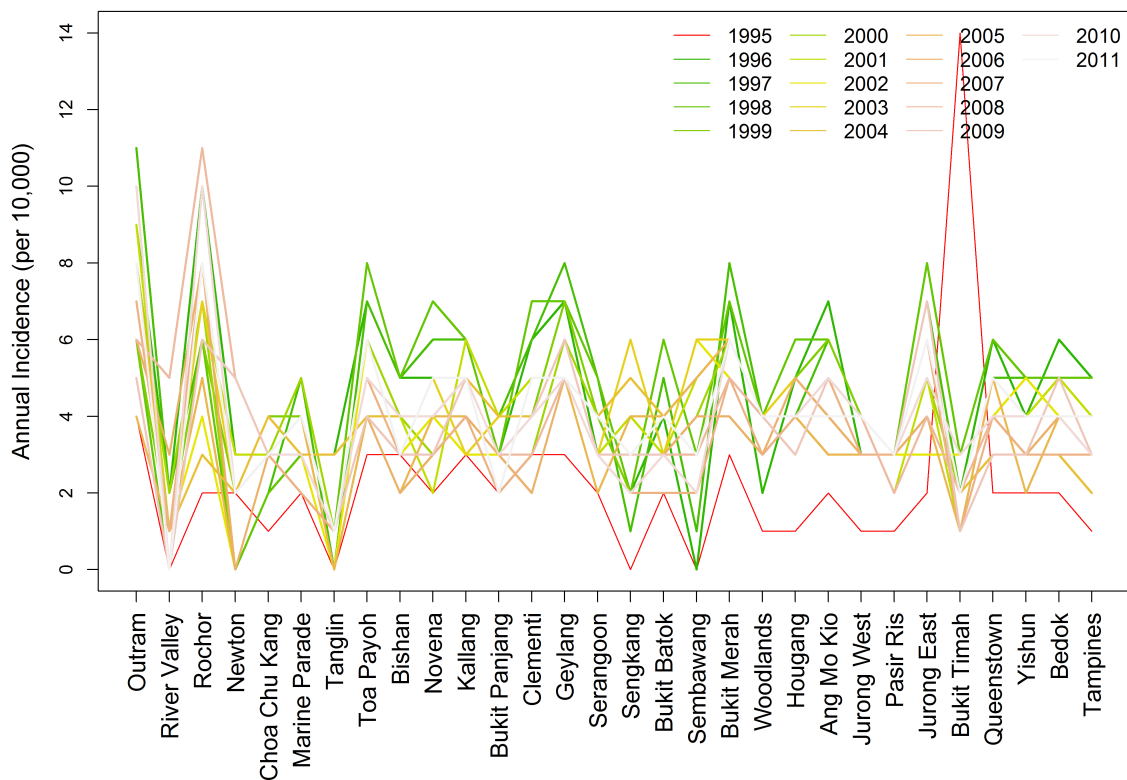

Figure S.1: Figure shows Annual incidence (per 10,000) of resident TB across thirty planning areas of Singapore between 1995 and 2011. Planning areas (x-axis) are presented in increasing order of land area.
